# Supplementary material for: Regional groundwater flow system in a stratovolcano adjacent to a coastal area: a case study of Mt. Fuji and Suruga Bay, Japan
Source: Springer Nature journal article supplement (doi:10.1007/s10040-018-1889-9), 2018-11-20
Supplement: MOESM1 [file 16284704]

**Regional groundwater flow system in a stratovolcano adjacent to a coastal area: a case study of Mt. Fuji and Suruga Bay, Japan**

Masahiko Ono<sup>1\*</sup>, Isao Machida<sup>1</sup>, Reo Ikawa<sup>1</sup>, Takafumi Kamitani<sup>2</sup>, Koichi Oyama<sup>3</sup>, Yasuhide Muranaka<sup>2</sup>,

Akira Ito<sup>4</sup>, Atsunao Marui<sup>1</sup>

1. Geological Survey of Japan, National Institute of Advanced Industrial Science and Technology,

Central 7, 1-1-1 Higashi, Tsukuba, Ibaraki 305-8567, Japan

e-mail: masa.ono@aist.go.jp

2. Shizuoka Institute of Environment and Hygiene, 4-27-2 Kita-ando, Aoi-ku, Shizuoka 420-8637, Japan

3. Administrative Bureau, Numazu Public Works Office, 1-3 Takashima-Honchou, Numazu 410-0055,

Japan

4. Living Environment Division, Shizuoka Prefectural Government, 9-6 Ote-machi, Aoi-Ku, Shizuoka

420-8601, Japan

\*Corresponding author

**Table S1** Results for in-situ physicochemical parameters and chemical analysis of well water.

(-: not measured. The data except  $E_{N.H.E.}$ , vanadium concentration observed in 2014, and  $^3H$  concentration, are from Ono et al. 2016)

| Site name | Type          | Surface elevation (m) | Well depth (m) | Screen depth (m)                                         | Sampling date | Water Temp. (°C) | pH  | EC (µS/cm) | ORP (mV) | $E_{N.H.E.}$ (mV) | DO (mg/L) | $HCO_3^-$ (mg/L) | Cl <sup>-</sup> (mg/L) | $NO_3^-$ (mg/L) | $SO_4^{2-}$ (mg/L) | Na <sup>+</sup> (mg/L) | K <sup>+</sup> (mg/L) | Mg <sup>2+</sup> (mg/L) | Ca <sup>2+</sup> (mg/L) | V (µg/L) | $\delta^{18}O$ (‰) | $\delta D$ (‰) | $^3H$ (T.U.) |
|-----------|---------------|-----------------------|----------------|----------------------------------------------------------|---------------|------------------|-----|------------|----------|-------------------|-----------|------------------|------------------------|-----------------|--------------------|------------------------|-----------------------|-------------------------|-------------------------|----------|--------------------|----------------|--------------|
| W1        | Well          | 677                   | 12             | unknown                                                  | 26-Nov-13     | 10.5             | 8.3 | 115        | 216      | 432               | 10.0      | 39.9             | 3.5                    | 3.3             | 8.9                | 7.9                    | 1.3                   | 3.2                     | 8.9                     | 60.9     | -9.9               | -67            | -            |
|           |               |                       |                |                                                          | 17-Jul-14     | 11.2             | 7.9 | 111        | 243      | 459               | 10.3      | 36.1             | 3.9                    | 4.3             | 9.9                | 7.9                    | 1.7                   | 2.8                     | 8.5                     | 56.0     | -10.2              | -67            | 1.4          |
| W2        | Well          | 574                   | 250            | 179-206, 212-217                                         | 26-Nov-13     | 11.7             | 8.7 | 67         | 195      | 410               | 10.6      | 35.6             | 0.6                    | 0.6             | 0.5                | 5.4                    | 0.2                   | 1.9                     | 5.2                     | 57.0     | -10.4              | -69            | -            |
|           |               |                       |                |                                                          | 17-Jul-14     | 12.2             | 8.5 | 61         | 244      | 459               | 10.1      | 35.7             | 0.8                    | 0.8             | 0.7                | 5.5                    | 0.3                   | 1.7                     | 5.3                     | 45.7     | -10.0              | -68            | <0.3         |
| W3        | Well          | 528                   | 120            | 76-120                                                   | 9-Dec-14      | 12.0             | 7.9 | 160        | 173      | 388               | 6.2       | 58.3             | 4.6                    | 6.3             | 10.0               | 10.1                   | 1.7                   | 4.5                     | 12.0                    | 39.8     | -9.2               | -61            | 1.3          |
| W4        | Well          | 525                   | 252            | 168-252                                                  | 9-Dec-14      | 13.7             | 8.0 | 98         | 144      | 358               | 9.1       | 43.3             | 2.3                    | 2.7             | 3.7                | 6.0                    | 1.5                   | 2.7                     | 8.7                     | 32.6     | -8.3               | -53            | 1.2          |
| W5        | Well          | 277                   | 94             | unknown                                                  | 26-Nov-13     | 14.1             | 7.7 | 123        | 228      | 442               | 9.4       | 51.5             | 2.6                    | 4.6             | 3.1                | 7.3                    | 1.6                   | 3.2                     | 10.9                    | 61.9     | -8.9               | -58            | -            |
|           |               |                       |                |                                                          | 10-Sep-14     | 14.3             | 7.3 | 126        | 166      | 379               | 9.9       | 56.3             | 3.0                    | 5.6             | 3.7                | 7.3                    | 1.7                   | 3.5                     | 11.5                    | 50.9     | -8.7               | -58            | 1.1          |
| W6        | Well          | 372                   | 250            | 124-129, 135-140, 151-162, 168-178, 184-217, 223-245     | 26-Nov-13     | 13.4             | 8.2 | 97         | 141      | 355               | 9.5       | 38.7             | 2.0                    | 1.7             | 4.8                | 5.3                    | 1.5                   | 3.1                     | 7.1                     | 52.1     | -8.5               | -55            | -            |
|           |               |                       |                |                                                          | 17-Jul-14     | 13.5             | 8.2 | 90         | 218      | 432               | 9.4       | 37.7             | 2.2                    | 2.2             | 5.3                | 5.3                    | 1.6                   | 2.9                     | 7.0                     | 41.9     | -8.4               | -55            | 1.6          |
| W7        | Well          | 579                   | 313            | 235-247, 259-277, 289-307                                | 26-Nov-13     | 13.2             | 8.3 | 80         | 186      | 400               | 8.6       | 38.3             | 1.1                    | 0.8             | 2.0                | 5.0                    | 0.8                   | 2.3                     | 6.5                     | 56.2     | -9.1               | -59            | -            |
|           |               |                       |                |                                                          | 17-Jul-14     | 13.0             | 8.2 | 75         | 236      | 450               | 9.4       | 37.8             | 1.3                    | 1.0             | 2.3                | 4.9                    | 0.8                   | 2.3                     | 6.6                     | 48.6     | -9.2               | -60            | 2.1          |
| W8        | Well          | 134                   | 53             | 25-53                                                    | 26-Nov-13     | 14.2             | 7.4 | 156        | 213      | 427               | 8.3       | 54.3             | 3.4                    | 6.3             | 6.1                | 8.8                    | 1.7                   | 3.1                     | 12.5                    | 58.4     | -9.2               | -61            | -            |
|           |               |                       |                |                                                          | 17-Jul-14     | 14.5             | 7.8 | 133        | 237      | 450               | 9.0       | 53.5             | 1.5                    | 0.7             | 4.7                | 9.0                    | 1.0                   | 3.1                     | 9.5                     | 50.9     | -8.9               | -61            | 0.7          |
| W9        | Well          | 143                   | 100            | 36-47, 52-63, 69-80                                      | 26-Nov-13     | 17.3             | 7.6 | 382        | 209      | 420               | 3.2       | 79.7             | 21.9                   | 1.6             | 71.0               | 41.6                   | 2.0                   | 9.5                     | 19.0                    | 88.7     | -10.8              | -74            | -            |
|           |               |                       |                |                                                          | 17-Jul-14     | 17.8             | 7.8 | 380        | 209      | 420               | 3.5       | 80.3             | 21.8                   | 2.0             | 73.8               | 41.5                   | 2.0                   | 9.2                     | 19.2                    | 91.4     | -11.0              | -74            | <0.3         |
| W10       | Well          | 259                   | 245            | 90-96, 101-107, 117-134, 145-156, 167-172, 178-184, 189- | 26-Nov-13     | 13.8             | 7.5 | 136        | 180      | 394               | 7.8       | 44.4             | 1.5                    | 0.3             | 19.4               | 7.1                    | 1.1                   | 4.0                     | 12.4                    | 39.2     | -8.5               | -57            | -            |
|           |               |                       |                |                                                          | 17-Jul-14     | 14.0             | 8.1 | 133        | 226      | 440               | 8.0       | 44.7             | 1.7                    | 2.3             | 2.8                | 6.0                    | 0.9                   | 2.2                     | 8.1                     | 30.3     | -8.7               | -56            | 0.8          |
| W11       | Well          | 256                   | 183            | 111-128, 136-142, 153-159, 165-171                       | 26-Nov-13     | 13.7             | 8.2 | 90         | 212      | 426               | 9.0       | 41.2             | 1.5                    | 1.7             | 2.4                | 6.0                    | 0.9                   | 2.0                     | 8.0                     | 57.0     | -8.8               | -57            | -            |
|           |               |                       |                |                                                          | 17-Jul-14     | 14.0             | 7.6 | 83         | 225      | 439               | 9.5       | 40.4             | 2.2                    | 1.8             | 4.8                | 6.4                    | 1.0                   | 2.2                     | 7.4                     | 47.2     | -8.9               | -57            | 1.4          |
| W12       | Well          | 116                   | 246            | 169-175, 187-193, 199-205, 212-217, 223-229, 235-241     | 26-Nov-13     | 13.4             | 8.0 | 116        | 166      | 380               | 8.3       | 57.0             | 1.2                    | 0.5             | 3.9                | 9.1                    | 0.9                   | 3.2                     | 9.4                     | 62.4     | -9.5               | -62            | -            |
|           |               |                       |                |                                                          | 17-Jul-14     | 13.7             | 8.2 | 116        | 234      | 448               | 8.3       | 57.1             | 1.5                    | 0.7             | 4.7                | 9.0                    | 1.0                   | 3.1                     | 9.5                     | 51.9     | -9.6               | -62            | <0.3         |
| W13       | Well          | 108                   | 122            | 80-110                                                   | 28-Nov-14     | 14.9             | 8.1 | 157        | 97       | 310               | 7.4       | 55.4             | 3.6                    | 9.0             | 5.4                | 10.5                   | 2.0                   | 3.8                     | 13.0                    | 65.3     | -8.3               | -54            | 0.3          |
| W14       | Well          | 48                    | 160            | 100-133                                                  | 4-Dec-14      | 16.8             | 8.2 | 144        | 123      | 335               | 8.2       | 65.4             | 3.3                    | 0.1             | 11.6               | 9.1                    | 2.3                   | 4.7                     | 12.0                    | 0.1      | -7.8               | -50            | 0.5          |
| W15       | Well          | 92                    | 182            | 131-149, 152-164, 167-177                                | 26-Nov-13     | 13.8             | 7.8 | 91         | 174      | 388               | 9.4       | 38.6             | 1.9                    | 1.3             | 4.1                | 6.4                    | 1.0                   | 2.3                     | 7.2                     | 55.6     | -8.7               | -57            | -            |
|           |               |                       |                |                                                          | 17-Jul-14     | 14.1             | 8.2 | 91         | 236      | 450               | 9.3       | 37.8             | 2.1                    | 0.5             | 20.8               | 7.2                    | 1.2                   | 3.6                     | 12.5                    | 47.6     | -8.8               | -57            | 1.7          |
| W16       | Well          | 84                    | 152            | 102-146                                                  | 8-Dec-14      | 15.2             | 7.7 | 255        | 124      | 336               | 8.6       | 39.0             | 10.2                   | 47.3            | 26.5               | 8.9                    | 3.0                   | 9.7                     | 19.8                    | 11.9     | -7.2               | -46            | 1.3          |
| W17       | Well          | 4                     | unknown        | 35-76                                                    | 7-Nov-14      | 15.9             | 7.5 | 3620       | 122      | 334               | 6.7       | 62.7             | 1042.5                 | 0.0             | 171.1              | 441.5                  | 11.4                  | 65.3                    | 176.8                   | 27.1     | -7.6               | -49            | <0.3         |
| W18       | Well          | 4                     | 250            | 190-250                                                  | 7-Nov-14      | 15.1             | 8.1 | 834        | 60       | 273               | 7.6       | 53.6             | 193.4                  | 0.7             | 46.8               | 96.5                   | 3.1                   | 14.1                    | 39.4                    | 28.1     | -8.6               | -55            | <0.3         |
| W19       | Artesian well | 5                     | 254            | 210-254                                                  | 28-Nov-14     | 13.7             | 8.3 | 120        | 138      | 352               | 8.7       | 48.1             | 4.1                    | 0.4             | 9.5                | 11.5                   | 1.3                   | 2.7                     | 8.2                     | 71.0     | -8.9               | -57            | <0.3         |
| W20       | Artesian well | 5                     | 140            | 110-130                                                  | 7-Nov-14      | 14.7             | 7.5 | 567        | 143      | 356               | 6.5       | 71.9             | 110.7                  | 3.6             | 32.7               | 69.1                   | 3.0                   | 10.3                    | 23.2                    | 39.9     | -9.1               | -59            | <0.3         |

Table S1 (continued)

| Site name | Type          | Surface elevation (m) | Well depth (m) | Screen depth (m)                          | Sampling date | Water Temp. (°C) | pH  | EC (µS/cm) | ORP (mV) | E <sub>N.H.E.</sub> (mV) | DO (mg/L) | HCO <sub>3</sub> <sup>-</sup> (mg/L) | Cl <sup>-</sup> (mg/L) | NO <sub>3</sub> <sup>-</sup> (mg/L) | SO <sub>4</sub> <sup>2-</sup> (mg/L) | Na <sup>+</sup> (mg/L) | K <sup>+</sup> (mg/L) | Mg <sup>2+</sup> (mg/L) | Ca <sup>2+</sup> (mg/L) | V (µg/L) | δ <sup>18</sup> O (‰) | δD (‰) | <sup>3</sup> H (T.U.) |
|-----------|---------------|-----------------------|----------------|-------------------------------------------|---------------|------------------|-----|------------|----------|--------------------------|-----------|--------------------------------------|------------------------|-------------------------------------|--------------------------------------|------------------------|-----------------------|-------------------------|-------------------------|----------|-----------------------|--------|-----------------------|
| W21       | Well          | 5                     | 50             | unknown                                   | 7-Nov-14      | 13.9             | 8.7 | 97         | 147      | 361                      | 9.0       | 46.9                                 | 2.4                    | 0.4                                 | 6.5                                  | 7.8                    | 1.3                   | 2.8                     | 8.7                     | 34.7     | -9.1                  | -58    | <0.3                  |
| W22       | Well          | 5                     | 320            | 259-314                                   | 28-Nov-14     | 13.6             | 8.5 | 130        | 132      | 345                      | 7.8       | 55.9                                 | 3.3                    | 0.4                                 | 10.6                                 | 9.6                    | 1.5                   | 3.5                     | 11.0                    | 36.7     | -8.9                  | -58    | <0.3                  |
| W23       | Well          | 5                     | unknown        | 65-?                                      | 7-Nov-14      | 17.0             | 7.2 | 232        | 177      | 388                      | 8.2       | 60.9                                 | 16.7                   | 13.6                                | 17.3                                 | 17.3                   | 2.9                   | 6.9                     | 15.5                    | 32.2     | -8.2                  | -52    | 1.1                   |
| W24       | Well          | 10                    | 130            | 82-94, 100-124                            | 26-Nov-13     | 13.2             | 8.2 | 141        | 205      | 419                      | 7.5       | 60.7                                 | 2.3                    | 0.5                                 | 8.9                                  | 10.8                   | 1.3                   | 4.0                     | 11.1                    | 69.4     | -9.5                  | -63    | -                     |
| W25       | Well          | 9                     | 200            | 156-200                                   | 28-Nov-14     | 15.4             | 7.1 | 209        | 128      | 341                      | 9.2       | 63.8                                 | 8.5                    | 17.9                                | 14.5                                 | 10.6                   | 2.9                   | 6.6                     | 18.1                    | 29.2     | -8.1                  | -52    | 0.6                   |
| W26       | Well          | 4                     | 112            | unknown                                   | 27-Nov-14     | 16.2             | 7.1 | 238        | 137      | 349                      | 6.2       | 65.1                                 | 18.7                   | 10.2                                | 19.2                                 | 18.0                   | 2.8                   | 6.6                     | 15.3                    | 37.8     | -8.6                  | -56    | 0.9                   |
| W27       | Artesian well | 5                     | 180            | unknown                                   | 27-Nov-14     | 14.5             | 7.7 | 447        | 114      | 327                      | 2.4       | 73.3                                 | 66.5                   | 0.6                                 | 38.7                                 | 24.9                   | 4.0                   | 12.7                    | 34.5                    | 38.2     | -9.6                  | -61    | <0.3                  |
| W28       | Well          | 10                    | 18             | 8-11                                      | 28-Nov-14     | 15.7             | 7.4 | 174        | 143      | 356                      | 7.0       | 63.6                                 | 5.5                    | 9.4                                 | 14.7                                 | 9.5                    | 2.4                   | 5.7                     | 14.6                    | 31.1     | -8.2                  | -54    | 0.9                   |
| W29       | Well          | 17                    | 20             | unknown                                   | 28-Nov-14     | 15.7             | 7.1 | 174        | 95       | 308                      | 7.7       | 67.1                                 | 5.1                    | 8.7                                 | 13.6                                 | 9.1                    | 2.3                   | 5.9                     | 14.8                    | 29.6     | -8.3                  | -54    | 0.9                   |
| W30       | Well          | 6                     | 200            | 140-200                                   | 4-Dec-14      | 14.2             | 8.0 | 253        | 183      | 397                      | 4.2       | 101.1                                | 6.3                    | 0.5                                 | 30.6                                 | 20.5                   | 2.4                   | 7.3                     | 18.9                    | 62.1     | -10.2                 | -66    | <0.3                  |
| W31       | Well          | 5                     | 250            | unknown                                   | 4-Dec-14      | 14.1             | 8.2 | 274        | 185      | 399                      | 3.6       | 86.5                                 | 12.0                   | 0.3                                 | 40.8                                 | 20.0                   | 2.1                   | 9.6                     | 19.2                    | 46.8     | -9.8                  | -63    | <0.3                  |
| W32       | Well          | 8                     | 180            | 150-170                                   | 26-Nov-14     | 15.1             | 7.9 | 374        | 95       | 308                      | 3.3       | 85.1                                 | 30.6                   | 0.3                                 | 48.3                                 | 26.8                   | 2.3                   | 11.5                    | 24.1                    | 69.9     | -10.1                 | -63    | <0.3                  |
| W33       | Well          | 4                     | 67             | 40-51, 56-67                              | 26-Nov-14     | 17.7             | 7.1 | 251        | 134      | 345                      | 2.7       | 89.8                                 | 7.4                    | 10.3                                | 24.6                                 | 9.1                    | 1.8                   | 5.2                     | 31.8                    | 3.3      | -8.5                  | -56    | 0.6                   |
| W34       | Well          | 5                     | 57             | 26-40                                     | 26-Nov-14     | 18.1             | 6.9 | 273        | 123      | 333                      | 3.3       | 99.8                                 | 7.6                    | 10.2                                | 26.1                                 | 10.6                   | 2.2                   | 5.2                     | 33.6                    | 3.0      | -8.4                  | -55    | 0.8                   |
| W35       | Well          | 10                    | 50             | 25-40                                     | 4-Dec-14      | 16.4             | 7.7 | 276        | 115      | 327                      | 2.7       | 98.6                                 | 6.7                    | 14.0                                | 24.7                                 | 8.8                    | 1.8                   | 5.3                     | 35.5                    | 7.5      | -8.5                  | -56    | 1.2                   |
| W36       | Well          | 10                    | 110            | 62-104                                    | 26-Nov-14     | 16.2             | 7.7 | 262        | 142      | 354                      | 3.0       | 92.5                                 | 6.3                    | 12.4                                | 22.2                                 | 9.9                    | 1.8                   | 5.0                     | 30.9                    | 8.1      | -8.6                  | -56    | 0.9                   |
| W37       | Well          | 13                    | 130            | 43-64, 86-130                             | 26-Nov-13     | 16.5             | 7.8 | 169        | -        | -                        | 6.3       | 57.0                                 | 4.3                    | 7.5                                 | 13.3                                 | 9.7                    | 1.8                   | 4.7                     | 14.6                    | 38.3     | -8.3                  | -55    | -                     |
|           |               |                       |                |                                           | 17-Jul-14     | 16.5             | 7.8 | 167        | 253      | 465                      | 6.7       | 57.0                                 | 4.6                    | 8.4                                 | 14.5                                 | 9.6                    | 1.9                   | 4.7                     | 14.7                    | 31.2     | -8.6                  | -55    | 0.8                   |
| W38       | Well          | 17                    | 100            | 70-100                                    | 26-Nov-14     | 17.3             | 6.9 | 197        | 140      | 351                      | 7.4       | 67.6                                 | 6.2                    | 9.6                                 | 19.0                                 | 9.1                    | 1.8                   | 5.7                     | 18.5                    | 4.7      | -8.6                  | -55    | 1.1                   |
| W39       | Well          | 20                    | 200            | 106-200                                   | 26-Nov-14     | 19.2             | 7.1 | 160        | 124      | 334                      | 7.6       | 58.4                                 | 6.3                    | 11.6                                | 15.0                                 | 9.5                    | 2.2                   | 5.8                     | 15.2                    | 23.0     | -8.4                  | -54    | 0.9                   |
| W40       | Well          | 24                    | 182            | 85-97, 115-127, 133-145, 151-163, 169-175 | 26-Nov-13     | 16.4             | 7.6 | 192        | 194      | 406                      | 4.9       | 56.7                                 | 6.6                    | 13.2                                | 15.7                                 | 9.5                    | 1.8                   | 6.1                     | 16.5                    | 31.0     | -8.1                  | -54    | -                     |
|           |               |                       |                |                                           | 17-Jul-14     | 16.9             | 8.0 | 183        | 217      | 429                      | -         | 57.6                                 | 6.7                    | 14.5                                | 17.1                                 | 9.4                    | 1.9                   | 6.1                     | 16.7                    | 28.9     | -8.5                  | -55    | 0.7                   |
| W41       | Well          | 24                    | 30             | 17-20                                     | 4-Dec-14      | 17.8             | 6.7 | 195        | 82       | 293                      | 5.5       | 65.3                                 | 6.5                    | 9.6                                 | 18.9                                 | 9.5                    | 2.0                   | 6.2                     | 18.0                    | 7.2      | -8.5                  | -55    | 1.1                   |
| W42       | Well          | 20                    | 65             | 30-?                                      | 25-Nov-14     | 17.5             | 6.7 | 255        | 141      | 352                      | 4.5       | 93.8                                 | 8.1                    | 7.5                                 | 22.2                                 | 11.0                   | 2.3                   | 4.6                     | 31.6                    | 2.7      | -8.5                  | -57    | 1.8                   |
| W43       | Well          | 17                    | 60             | 45-60                                     | 25-Nov-14     | 18.3             | 6.8 | 322        | 257      | 468                      | 4.7       | 104.0                                | 12.6                   | 13.5                                | 35.6                                 | 14.6                   | 2.6                   | 5.3                     | 38.9                    | 3.6      | -8.2                  | -54    | 1.6                   |
| W44       | Well          | 18                    | 75             | 20-70                                     | 25-Nov-14     | 17.8             | 7.2 | 274        | 72       | 283                      | 5.0       | 78.4                                 | 8.9                    | 16.1                                | 30.9                                 | 17.1                   | 1.9                   | 6.8                     | 23.6                    | 7.6      | -7.9                  | -51    | 1.0                   |
| W45       | Well          | 18                    | 70             | 60-70                                     | 25-Nov-14     | 17.5             | 6.9 | 255        | 145      | 356                      | 7.0       | 80.7                                 | 9.0                    | 16.8                                | 32.9                                 | 16.7                   | 1.9                   | 7.5                     | 23.1                    | 8.9      | -7.6                  | -49    | 0.9                   |
| W46       | Well          | 16                    | 98             | 53-85                                     | 25-Nov-14     | 17.5             | 7.1 | 290        | 152      | 363                      | 4.5       | 101.7                                | 9.2                    | 7.7                                 | 23.5                                 | 10.7                   | 2.2                   | 5.4                     | 35.7                    | 5.5      | -8.9                  | -58    | 1.1                   |
| W47       | Well          | 16                    | 100            | 35-60                                     | 26-Nov-14     | 18.2             | 7.0 | 308        | 142      | 353                      | 3.4       | 105.0                                | 11.2                   | 11.2                                | 31.0                                 | 13.3                   | 2.2                   | 5.8                     | 37.4                    | 3.2      | -8.4                  | -55    | 1.7                   |
| W48       | Well          | 15                    | 77             | 39-67                                     | 26-Nov-14     | 18.7             | 6.8 | 337        | 112      | 323                      | 0.5       | 100.4                                | 21.6                   | 5.6                                 | 38.4                                 | 27.7                   | 2.0                   | 6.5                     | 29.8                    | 5.1      | -7.7                  | -49    | 0.9                   |
| W49       | Well          | 11                    | 100            | unknown                                   | 25-Nov-14     | 16.9             | 7.0 | 244        | -15      | 197                      | 4.2       | 82.9                                 | 11.8                   | 6.3                                 | 24.5                                 | 9.2                    | 1.9                   | 6.0                     | 28.2                    | 6.1      | -9.0                  | -60    | 1.5                   |
| W50       | Well          | 6                     | 9              | unknown                                   | 25-Nov-14     | 21.6             | 7.3 | 355        | 139      | 347                      | 3.6       | 106.2                                | 16.2                   | 10.3                                | 40.9                                 | 19.8                   | 2.2                   | 6.3                     | 38.9                    | 2.0      | -8.3                  | -54    | 1.4                   |
| W51       | Well          | 9                     | 10             | unknown                                   | 25-Nov-14     | 19.4             | 6.7 | 287        | 89       | 299                      | 4.5       | 94.8                                 | 15.3                   | 11.1                                | 25.2                                 | 14.1                   | 1.8                   | 7.0                     | 30.2                    | 2.4      | -7.7                  | -50    | 1.1                   |
| W52       | Well          | 10                    | 9              | unknown                                   | 25-Nov-14     | 18.7             | 6.7 | 245        | 152      | 362                      | 6.8       | 53.0                                 | 21.3                   | 18.5                                | 21.0                                 | 20.2                   | 3.4                   | 7.2                     | 15.6                    | 4.5      | -7.3                  | -46    | 1.5                   |
| W53       | Well          | 8                     | 9              | unknown                                   | 25-Nov-14     | 20.8             | 6.7 | 409        | 197      | 406                      | 3.8       | 162.5                                | 13.2                   | 24.3                                | 21.8                                 | 45.2                   | 3.0                   | 6.8                     | 30.1                    | 1.6      | -7.4                  | -46    | 1.5                   |

**Table S2** Results for in-situ physicochemical parameters and chemical analysis of spring water. (-: not

measured. The data except  $E_{N.H.E.}$  and vanadium concentration observed in 2014 are from Ono et al. 2016)

| Site name | Surface elevation (m) | Sampling date | Water Temp. (°C) | pH  | EC (μS/cm) | ORP (mV) | $E_{N.H.E.}$ (mV) | DO (mg/L) | $HCO_3^-$ (mg/L) | Cl (mg/L) | $NO_3^-$ (mg/L) | $SO_4^{2-}$ (mg/L) | Na <sup>+</sup> (mg/L) | K <sup>+</sup> (mg/L) | Mg <sup>2+</sup> (mg/L) | Ca <sup>2+</sup> (mg/L) | V (μg/L) | $\delta^{18}O$ (‰) | $\delta D$ (‰) |
|-----------|-----------------------|---------------|------------------|-----|------------|----------|-------------------|-----------|------------------|-----------|-----------------|--------------------|------------------------|-----------------------|-------------------------|-------------------------|----------|--------------------|----------------|
| S1        | 716                   | 11-Nov-13     | 10.3             | 7.0 | 98         | 256      | 472               | 9.2       | 34.2             | 3.8       | 2.7             | 6.5                | 5.7                    | 1.2                   | 2.1                     | 8.9                     | 29.4     | -9.1               | -60            |
|           |                       | 16-Sep-14     | 10.6             | 7.0 | 98         | 188      | 404               | 9.5       | 31.8             | 3.9       | 3.8             | 7.0                | 5.6                    | 1.2                   | 2.4                     | 9.0                     | 26.3     | -9.2               | -60            |
| S2        | 705                   | 11-Nov-13     | 11.0             | 7.3 | 89         | 192      | 408               | 8.8       | 34.3             | 3.2       | 2.9             | 5.1                | 4.7                    | 1.2                   | 1.9                     | 9.0                     | 18.3     | -8.8               | -58            |
|           |                       | 16-Sep-14     | 11.2             | 6.4 | 89         | 161      | 377               | 8.9       | 28.4             | 3.2       | 4.2             | 5.4                | 4.5                    | 1.1                   | 2.1                     | 8.9                     | 16.3     | -8.9               | -58            |
| S3        | 694                   | 11-Nov-13     | 11.6             | 7.0 | 58         | 200      | 415               | 9.3       | 29.1             | 2.3       | 3.0             | 4.4                | 3.6                    | 0.9                   | 1.5                     | 8.3                     | 22.0     | -8.7               | -57            |
|           |                       | 16-Sep-14     | 11.9             | 6.8 | 79         | 181      | 396               | 8.5       | 34.9             | 2.3       | 4.2             | 4.9                | 3.6                    | 0.9                   | 1.8                     | 8.6                     | 10.5     | -8.8               | -57            |
| S4        | 695                   | 11-Nov-13     | 12.3             | 7.2 | 69         | 226      | 441               | 9.6       | 22.7             | 1.0       | 1.9             | 7.4                | 2.6                    | 0.3                   | 1.0                     | 7.9                     | 1.0      | -8.7               | -56            |
|           |                       | 16-Sep-14     | 12.3             | 6.8 | 71         | 203      | 418               | 9.6       | 25.2             | 1.1       | 2.1             | 8.3                | 2.6                    | 0.4                   | 1.4                     | 8.3                     | 0.9      | -8.8               | -55            |
| S5        | 670                   | 11-Nov-13     | 12.3             | 7.6 | 97         | 211      | 426               | 8.1       | 36.9             | 1.2       | 2.1             | 8.8                | 3.6                    | 0.1                   | 1.8                     | 11.8                    | 2.1      | -8.3               | -53            |
|           |                       | 16-Sep-14     | 12.6             | 7.6 | 100        | 212      | 427               | 7.9       | 32.4             | 1.4       | 2.6             | 9.8                | 3.6                    | 0.2                   | 2.2                     | 12.2                    | 1.9      | -8.3               | -52            |
| S6        | 480                   | 11-Nov-13     | 12.6             | 6.9 | 128        | 127      | 342               | 8.8       | 44.1             | 4.7       | 5.3             | 9.1                | 8.6                    | 1.8                   | 3.2                     | 10.3                    | 42.9     | -9.4               | -61            |
|           |                       | 16-Sep-14     | 13.2             | 6.9 | 118        | 199      | 413               | 7.1       | 39.1             | 4.7       | 6.5             | 9.6                | 8.7                    | 1.7                   | 3.5                     | 10.4                    | 34.7     | -9.3               | -61            |
| S7        | 241                   | 12-Nov-13     | 15.0             | 7.8 | 156        | 161      | 374               | 9.2       | 61.3             | 4.5       | 6.6             | 8.3                | 8.4                    | 1.8                   | 3.7                     | 14.4                    | 31.7     | -8.7               | -57            |
|           |                       | 16-Sep-14     | 15.6             | 7.2 | 168        | 202      | 415               | -         | 60.1             | 4.8       | 8.4             | 10.1               | 8.5                    | 1.8                   | 5.4                     | 15.5                    | 26.0     | -8.6               | -57            |
| S8        | 421                   | 11-Nov-13     | 15.2             | 6.9 | 179        | 150      | 363               | 7.0       | 75.1             | 2.5       | 15.2            | 3.4                | 5.6                    | 2.2                   | 4.4                     | 19.5                    | 40.0     | -7.7               | -50            |
|           |                       | 16-Sep-14     | 16.9             | 6.9 | 187        | 216      | 428               | 5.4       | 70.7             | 4.4       | 15.1            | 4.6                | 5.7                    | 2.3                   | 5.8                     | 20.6                    | 34.3     | -7.2               | -47            |
| S9        | 1633                  | 28-Nov-13     | 8.6              | 7.9 | 69         | 250      | 467               | 8.9       | 31.2             | 0.9       | 0.8             | 1.0                | 2.6                    | 0.9                   | 2.1                     | 6.4                     | 21.2     | -9.5               | -61            |
|           |                       | 17-Sep-14     | 9.1              | 7.5 | 69         | 248      | 465               | 8.5       | 37.3             | 1.3       | 0.8             | 1.1                | 2.7                    | 0.9                   | 2.4                     | 6.8                     | 15.9     | -9.3               | -58            |
| S10       | 396                   | 11-Nov-13     | 14.0             | 7.6 | 163        | 231      | 445               | 9.2       | 50.6             | 3.9       | 20.0            | 8.2                | 5.2                    | 0.8                   | 5.2                     | 17.7                    | 6.6      | -7.6               | -49            |
|           |                       | 16-Sep-14     | 18.3             | 7.4 | 178        | 200      | 411               | 7.6       | 54.1             | 4.1       | 24.5            | 11.4               | 5.6                    | 0.9                   | 5.4                     | 19.2                    | 5.3      | -7.6               | -49            |
| S11       | 499                   | 11-Nov-13     | 13.9             | 7.3 | 129        | 239      | 453               | 8.5       | 53.3             | 4.0       | 6.6             | 3.6                | 4.7                    | 0.5                   | 3.6                     | 14.5                    | 8.9      | -7.6               | -49            |
|           |                       | 16-Sep-14     | 16.8             | 7.2 | 156        | 195      | 407               | 7.6       | 64.2             | 4.5       | 9.4             | 2.6                | 5.4                    | 0.6                   | 4.6                     | 18.2                    | 4.5      | -7.7               | -49            |
| S12       | 334                   | 11-Nov-13     | 14.8             | 7.0 | 145        | 239      | 452               | 9.1       | 53.1             | 3.4       | 8.7             | 9.2                | 5.2                    | 2.2                   | 4.0                     | 15.6                    | 14.9     | -7.7               | -50            |
|           |                       | 16-Sep-14     | 15.2             | 6.8 | 149        | 204      | 417               | 9.2       | 52.6             | 3.7       | 8.5             | 9.5                | 5.4                    | 2.2                   | 4.2                     | 16.0                    | 13.9     | -7.6               | -49            |
| S13       | 525                   | 14-Nov-13     | 12.2             | 7.4 | 157        | 212      | 427               | 2.7       | 54.6             | 6.0       | 10.6            | 6.5                | 5.5                    | 2.1                   | 5.8                     | 13.5                    | 66.2     | -7.4               | -46            |
|           |                       | 17-Sep-14     | 17.2             | 6.8 | 154        | 193      | 405               | 0.9       | 52.2             | 6.8       | 7.1             | 7.5                | 5.2                    | 2.5                   | 6.0                     | 14.1                    | 43.1     | -7.0               | -43            |
| S14       | 120                   | 12-Nov-13     | 14.0             | 7.2 | 129        | 206      | 420               | 8.8       | 48.7             | 5.0       | 5.9             | 7.2                | 7.3                    | 2.1                   | 2.7                     | 11.7                    | 48.2     | -8.7               | -57            |
|           |                       | 17-Sep-14     | 14.2             | 6.9 | 124        | 219      | 433               | 9.7       | 47.4             | 4.5       | 7.0             | 8.0                | 7.1                    | 2.0                   | 4.2                     | 11.8                    | 40.5     | -8.7               | -56            |
| S15       | 120                   | 12-Nov-13     | 14.4             | 7.2 | 141        | 208      | 421               | 8.6       | 48.6             | 8.5       | 5.6             | 5.6                | 8.0                    | 2.2                   | 2.7                     | 12.4                    | 49.6     | -8.9               | -57            |
|           |                       | 17-Sep-14     | 14.4             | 6.8 | 148        | 206      | 419               | 8.8       | 46.3             | 8.0       | 7.7             | 7.3                | 8.3                    | 2.2                   | 4.0                     | 12.9                    | 42.0     | -8.7               | -57            |
| S16       | 127                   | 12-Nov-13     | 14.2             | 7.3 | 133        | 211      | 425               | 8.7       | 51.7             | 5.2       | 5.6             | 4.7                | 7.8                    | 2.0                   | 2.4                     | 12.2                    | 55.6     | -9.0               | -59            |
|           |                       | 17-Sep-14     | 14.5             | 6.8 | 131        | 202      | 415               | 9.5       | 57.7             | 5.3       | 7.4             | 6.1                | 8.1                    | 2.0                   | 3.7                     | 12.6                    | 47.8     | -8.9               | -58            |
| S17       | 128                   | 12-Nov-13     | 15.1             | 7.4 | 175        | 163      | 375               | 6.9       | 58.3             | 7.0       | 5.2             | 16.2               | 14.7                   | 1.8                   | 3.1                     | 13.0                    | 73.4     | -9.3               | -62            |
|           |                       | 17-Sep-14     | 15.2             | 7.0 | 179        | 206      | 419               | 7.2       | 60.3             | 6.3       | 6.2             | 17.5               | 14.5                   | 1.8                   | 4.6                     | 13.0                    | 64.1     | -9.6               | -63            |
| S18       | 161                   | 12-Nov-13     | 13.8             | 7.5 | 148        | 199      | 413               | 8.8       | 54.1             | 3.0       | 5.1             | 12.8               | 6.8                    | 1.7                   | 4.1                     | 13.5                    | 41.0     | -8.5               | -56            |
|           |                       | 17-Sep-14     | 14.3             | 7.4 | 140        | 206      | 419               | 8.5       | 53.2             | 3.8       | 5.8             | 13.8               | 7.0                    | 2.4                   | 5.4                     | 13.5                    | 33.0     | -8.4               | -56            |
| S19       | 195                   | 12-Nov-13     | 15.6             | 7.1 | 169        | 203      | 416               | 7.1       | 47.1             | 5.3       | 13.8            | 16.1               | 6.5                    | 2.7                   | 3.4                     | 17.7                    | 8.9      | -7.6               | -49            |
|           |                       | 17-Sep-14     | 15.2             | 6.8 | 182        | 259      | 472               | 9.1       | 51.6             | 5.4       | 18.3            | 18.8               | 6.9                    | 2.7                   | 5.1                     | 19.7                    | 8.0      | -7.3               | -47            |
| S20       | 231                   | 12-Nov-13     | 15.8             | 7.0 | 178        | 210      | 422               | 8.4       | 36.2             | 5.7       | 17.3            | 21.6               | 6.1                    | 3.1                   | 3.3                     | 18.3                    | 11.7     | -7.5               | -48            |
|           |                       | 17-Sep-14     | 15.9             | 6.9 | 186        | 269      | 481               | 9.8       | 39.9             | 5.9       | 21.2            | 22.8               | 6.3                    | 3.0                   | 4.6                     | 19.1                    | 10.7     | -7.4               | -48            |
| S21       | 195                   | 12-Nov-13     | 16.1             | 7.5 | 191        | 209      | 421               | 8.6       | 34.3             | 5.7       | 24.1            | 32.7               | 6.0                    | 4.7                   | 4.8                     | 21.6                    | 15.7     | -7.3               | -47            |
|           |                       | 17-Sep-14     | 16.5             | 7.0 | 208        | 224      | 436               | 9.4       | 39.6             | 7.2       | 31.1            | 32.2               | 7.1                    | 4.3                   | 6.3                     | 22.0                    | 12.1     | -7.3               | -47            |
| S22       | 339                   | 14-Nov-13     | 14.1             | 7.1 | 214        | 236      | 450               | 4.5       | 64.4             | 7.4       | 22.5            | 9.6                | 9.3                    | 6.1                   | 6.4                     | 16.9                    | 45.2     | -7.3               | -45            |
|           |                       | 17-Sep-14     | 18.6             | 6.9 | 205        | 181      | 391               | 6.2       | 73.5             | 7.2       | 16.4            | 11.0               | 9.4                    | 6.0                   | 6.4                     | 16.6                    | 45.8     | -7.1               | -44            |
| S23       | 108                   | 12-Nov-13     | 15.7             | 7.7 | 176        | 231      | 444               | 9.1       | 79.2             | 5.8       | 8.7             | 1.4                | 6.9                    | 1.3                   | 4.2                     | 19.1                    | 17.8     | -7.5               | -47            |
|           |                       | 17-Sep-14     | 16.3             | 7.3 | 183        | 305      | 517               | 9.2       | 84.5             | 5.7       | 11.8            | 2.7                | 6.8                    | 1.3                   | 6.1                     | 19.2                    | 14.4     | -7.5               | -47            |
| S24       | 92                    | 12-Nov-13     | 17.3             | 6.5 | 210        | 212      | 423               | 8.5       | 38.6             | 6.7       | 22.0            | 28.0               | 7.1                    | 3.8                   | 4.4                     | 21.4                    | 13.0     | -7.4               | -47            |
|           |                       | 17-Sep-14     | 17.6             | 6.4 | 212        | 241      | 452               | 9.0       | 57.3             | 7.8       | 25.8            | 27.4               | 7.1                    | 3.6                   | 5.5                     | 20.7                    | 15.2     | -7.3               | -46            |
| S25       | 160                   | 13-Dec-14     | 14.3             | 6.9 | 125        | 187      | 400               | 9.2       | 51.8             | 3.9       | 4.0             | 3.4                | 5.7                    | 1.7                   | 3.9                     | 11.8                    | 7.5      | -7.5               | -46            |
| S26       | 325                   | 13-Dec-14     | 12.7             | 7.2 | 86         | 141      | 355               | 9.1       | 46.5             | 2.8       | 3.3             | 1.3                | 5.7                    | 0.4                   | 3.5                     | 10.1                    | 3.3      | -7.8               | -49            |
| S27       | 13                    | 20-Jan-15     | 14.0             | 7.5 | 187        | 254      | 468               | 6.1       | 66.1             | 8.0       | 5.3             | 18.4               | 9.5                    | 1.6                   | 3.4                     | 21.2                    | 4.8      | -9.0               | -59            |
| S28       | 10                    | 12-Nov-13     | 15.0             | 7.5 | 167        | 216      | 429               | 7.0       | 63.4             | 5.8       | 8.8             | 7.4                | 8.7                    | 2.6                   | 4.3                     | 14.8                    | 47.0     | -8.1               | -52            |
|           |                       | 16-Sep-14     | 15.3             | 7.1 | 184        | 110      | 323               | 8.9       | 68.0             | 7.3       | 14.0            | 10.8               | 9.5                    | 2.7                   | 6.1                     | 16.5                    | 40.2     | -8.1               | -52            |
| S29       | 5                     | 13-Nov-13     | 14.9             | 7.3 | 171        | 197      | 410               | 8.6       | 58.2             | 5.6       | 10.5            | 11.1               | 9.2                    | 2.6                   | 4.4                     | 14.9                    | 37.7     | -8.2               | -52            |
|           |                       | 02-Oct-14     | 15.0             | 6.7 | 160        | 222      | 435               | 8.2       | 57.9             | 5.6       | 11.9            | 12.2               | 8.9                    | 2.5                   | 5.6                     | 15.1                    | 37.9     | -8.2               | -53            |
| S30       | 9                     | 13-Nov-13     | 14.5             | 7.4 | 135        | 171      | 384               | 9.3       | 43.3             | 3.3       | 8.8             | 10.5               | 6.9                    | 2.1                   | 2.8                     | 12.1                    | 39.6     | -8.4               | -55            |
|           |                       | 02-Oct-14     | 14.9             | 6.8 | 132        | 232      | 445               | 8.3       | 41.9             | 3.2       | 8.6             | 10.2               | 6.8                    | 2.0                   | 3.9                     | 11.8                    | 37.0     | -8.7               | -55            |
| S31       | 20                    | 13-Nov-13     | 14.0             | 7.5 | 118        | 157      | 371               | 9.3       | 41.9             | 3.0       | 6.3             | 7.5                | 6.5                    | 1.6                   | 2.5                     | 10.4                    | 43.3     | -8.5               | -55            |
|           |                       | 02-Oct-14     | 14.1             | 6.9 | 121        | 227      | 441               | 9.8       | 40.2             | 2.9       | 7.2             | 8.4                | 6.6                    | 1.6                   | 3.7                     | 10.7                    | 31.5     | -8.7               | -55            |
| S32       | 28                    | 13-Nov-13     | 13.4             | 7.7 | 89         | 176      | 390               | 9.8       | 36.7             | 2.3       | 2.5             | 4.3                | 6.0                    | 1.2                   | 1.7                     | 7.3                     | 42.7     | -8.7               | -56            |
|           |                       | 02-Oct-14     | 13.6             | 7.1 | 89         | 228      | 442               | 9.8       | 34.8             | 2.4       | 3.0             | 5.2                | 6.1                    | 1.2                   | 2.7                     | 7.7                     | 39.6     | -8.9               | -56            |
| S33       | 26                    | 13-Nov-13     | 13.7             | 7.9 | 94         | 197      | 410               | 6.7       | 37.0             | 3.0       | 3.0             | 4.6                | 6.1                    | 1.6                   | 1.9                     | 7.7                     | 37.6     | -8.4               | -55            |
|           |                       | 16-Sep-14     | 14.5             | 7.3 | 96         | 167      | 380               | 10.5      | 50.8             | 3.1       | 3.8             | 5.3                | 6.1                    | 1.6                   | 2.8                     | 7.9                     | 32.9     | -8.6               | -55            |
| S34       | 9                     | 13-Nov-13     | 14.2             | 7.4 | 110        | 191      | 405               | 9.3       | 38.4             | 4.1       | 5.3             | 6.2                | 6.4                    | 2.1                   | 2.4                     | 8.8                     | 36.5     | -8.2               | -53            |
|           |                       | 02-Oct-14     | 14.4             | 7.0 | 113        | 217      | 430               | 10.2      | 42.6             | 4.2       | 6.1             | 7.3                | 6.5                    | 2.1                   | 3.4                     | 9.1                     | 35.4     | -8.6               | -53            |
| S35       | 18                    | 13-Nov-13     | 16.8             | 7.2 | 209        | 199      | 411               | 8.2       | 51.7             | 7.8       | 22.3            | 19.5               | 8.0                    | 3.7                   | 6.6                     | 18.3                    | 20.9     | -7.4               | -47            |
|           |                       | 02-Oct-14     | 16.9             | 6.7 | 207        | 210      | 422               | 8.8       | 55.8             | 7.6       | 24.4            | 20.4               | 8.0                    | 3.5                   | 7.6                     | 18.1                    | 16.7     | -7.5               | -47            |

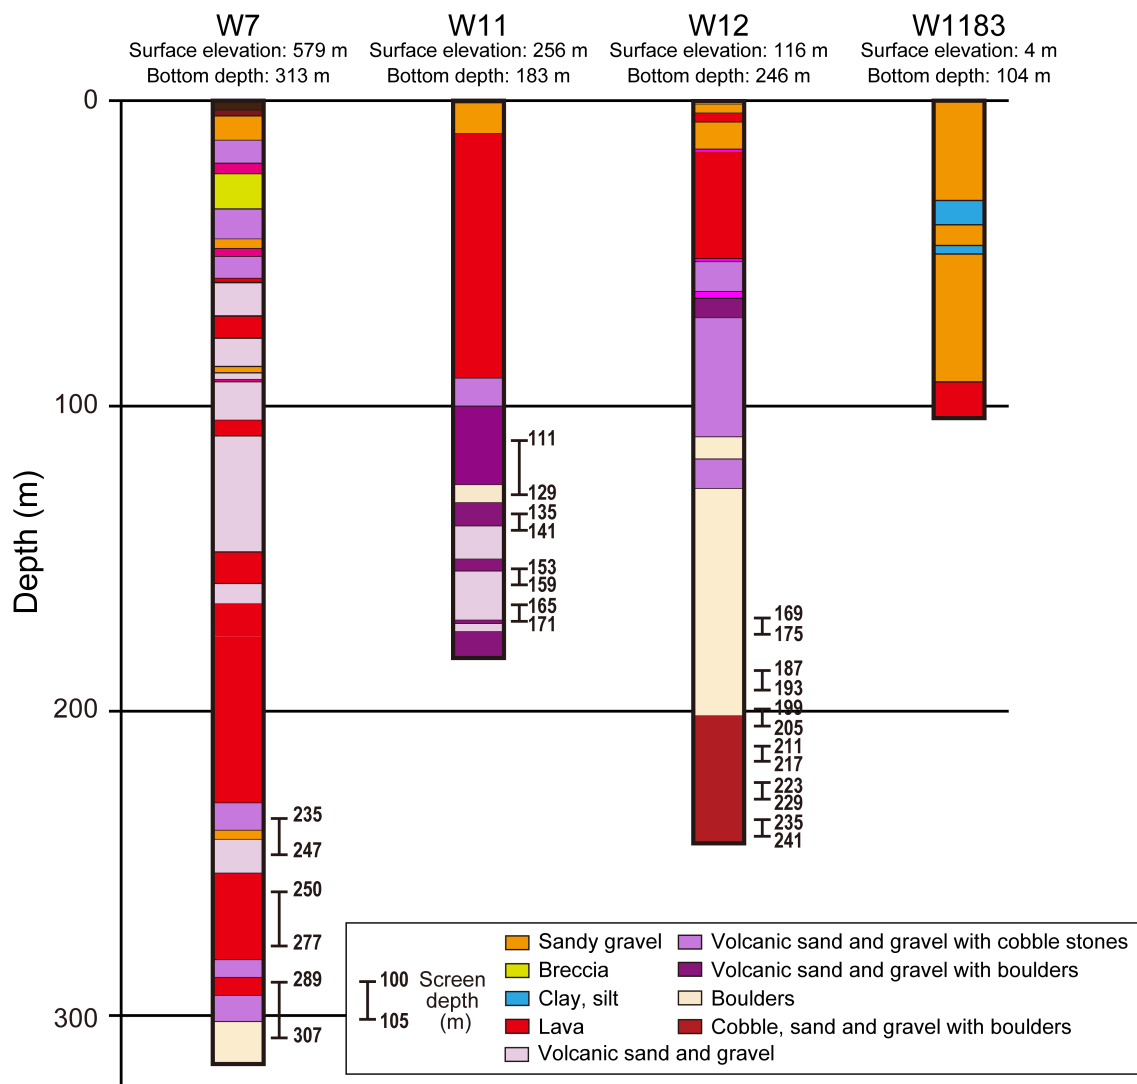

**Fig. S1** Geologic log profiles at the southwestern foot of Mt. Fuji: The profiles of W7, W11, and W12 are shown in Fig. 9(a). The profile of W1183 is modified from Earthquake Preparedness Division, Shizuoka Prefecture Government (1984), and shown in Fig. 9 (a) and (b).

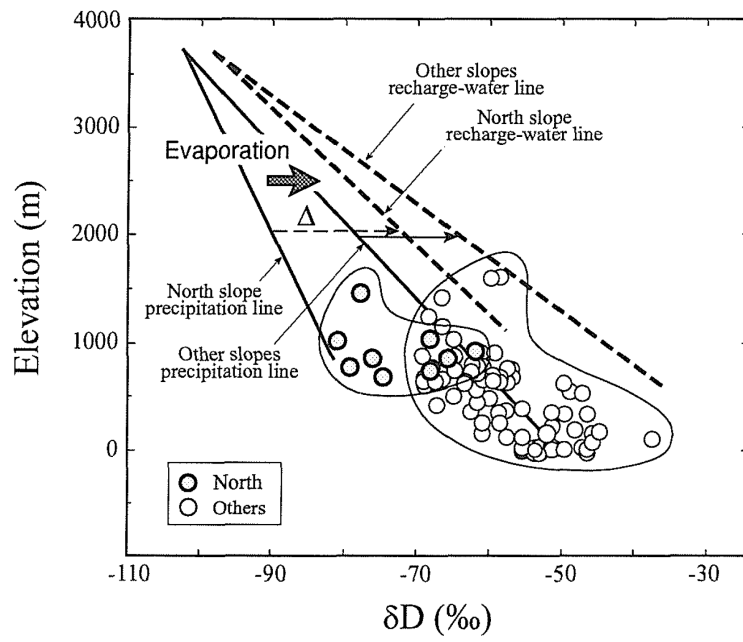

**Fig. S2** Relation between and elevation for groundwaters on the leeward north and windward slopes of Mt. Fuji (August 1993 and July 1994) from Yasuhara et al. (1997). “Other slopes” means south, east, and west slopes of Mt. Fuji, and therefore, the recharge-water line of other slopes has been used for this study.

## ESM References

Earthquake Preparedness Division, Shizuoka Prefecture Government (1984) Shizuoka Ken Chishitsu Danmenzu (Geological cross sections in Shizuoka Prefecture). Countermeasure document for earthquake. (in Japanese)

Ono M, Ikawa R, Machida I, Marui A, Muranaka Y, Kamitani T, Oyama K, Ito A (2016) Water Environment Map No.9 Mt. Fuji Area. Geological Survey of Japan (in Japanese)

Yasuhara M, Marui A, Kazahaya K (1997) Stable isotopic composition of groundwater from Mt. Yatsugatake and Mt. Fuji, Japan. IAHS Publ, Proc of the Rabat Symp. April 1997 244:335-344
